# Supplementary material for: Efficacy and safety of brolucizumab versus aflibercept in eyes with polypoidal choroidal vasculopathy in Japanese participants of HAWK
Source: HighWire-hosted journal article supplement (doi:10.1136/bjophthalmol-2021-319090), 2021-07-22
Supplement: bjophthalmol-2021-319090supp001_data_supplement.pdf [file bjophthalmol-2021-319090supp001_data_supplement.pdf]

**Supplementary Table 1:** Intraocular inflammation cases in brolocizumab 6 mg-treated Japanese eyes with PCV.

| Pt # | Adverse Event as reported (preferred term) | AE start (day) | Duration (days)                  | Other adverse events as reported (preferred term)          | Treatment for IOI (Days administered)                                                                                                    | Action taken with study drug                                                                    | Latest BCVA vs BL | As noted by the SRC |              |              |
|------|--------------------------------------------|----------------|----------------------------------|------------------------------------------------------------|------------------------------------------------------------------------------------------------------------------------------------------|-------------------------------------------------------------------------------------------------|-------------------|---------------------|--------------|--------------|
|      |                                            |                |                                  |                                                            |                                                                                                                                          |                                                                                                 |                   | Inflammation        | Vasculitis   | Occlusive    |
| 1    | Iritis                                     | 29             | 29                               | -                                                          | No medications for IOI administered                                                                                                      | Patient continued on treatment and completed study                                              | 50 (+10L)         | Yes probable        | No           | No           |
| 2    | Uveitis                                    | 51             | 287                              | -                                                          | Top Betamethasone (85-106; 183-309), Top Fluorometholone (106-168), IO Dexamethasone (184), IO Triamcinolone (148 and 192)               | Drug withdrawn (last injection Day 120)                                                         | 75 (+16L)         | Yes                 | Yes          | No           |
| 3    | Iritis                                     | 50             | 183                              | Cataract aggravated (Cataract)                             | Top Levofloxacin (54-63), Top Bromfenac (57-81; 84-141), Top Betamethasone (84-141), Subconj Dexamethasone (92), Top Aciclovir (100-172) | Drug withdrawn (last injection Day 57)                                                          | 52 (-4L)          | Yes                 | Yes          | No           |
| 4    | Uveitis                                    | 12             | 214                              | Branch retinal artery occlusion (Retinal artery occlusion) | Top Moxifloxacin (26-33), Top Betamethasone (26-81; 141-166), Top Fluorometholone (82-141, 167-194; 226-365), Top Bromfenac (195-225)    | Patient continued on treatment but later withdrew from study due to change in living conditions | 80 (+18L)         | Yes                 | Yes          | Yes          |
| 5    | Anterior chamber inflammation              | 17             | 21                               | -                                                          | Top Moxifloxacin (17-37)                                                                                                                 | Patient continued on treatment and completed study                                              | 87 (+19L)         | Yes probable        | Yes probable | Yes probable |
| 6    | Retinal perivascular sheathing             | 167            | Ongoing at last report (Day 197) | -                                                          | No medication administered                                                                                                               | Drug withdrawn (last injection Day 139)                                                         | 70 (0L)           | Yes                 | Yes          | No           |

Medical Dictionary for Regulatory Activities Version 20.1 has been used for the reporting of adverse events. AE, adverse event; BCVA, best corrected visual acuity; BL, baseline; IOI, intraocular inflammation; L, letters; SRC, Safety Review Committee; Top, topical.

**Supplementary Figure S1: HAWK study design**

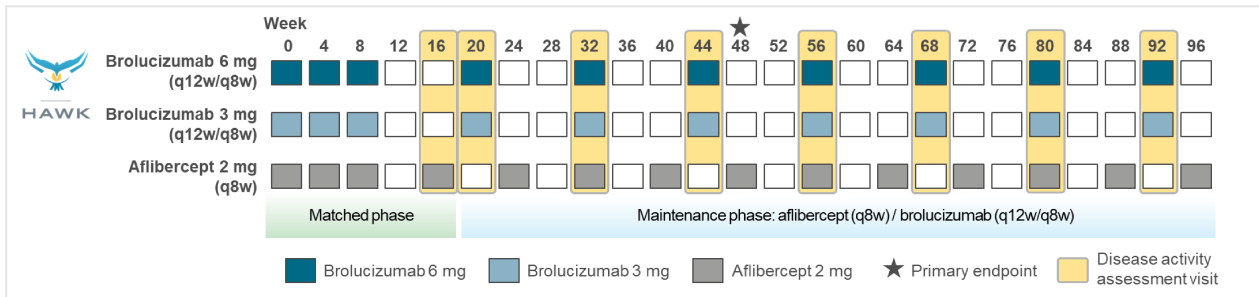

q8w, every 8 weeks; q12w, every 12 weeks.
